# Supplementary material for: Utilising the perspectives of patients with lower-limb osteoarthritis on prescribed physical activity to develop a theoretically informed physiotherapy intervention
Source: Springer Nature journal article supplement (doi:10.1186/s12891-021-04036-8), 2021-02-08
Supplement: MOESM2 [file 18842160]

Additional File 2:

Behaviour Change Technique and Domains Matrix

|       | TDF<br>DOMAIN | KN   | SK | SPRI | BOCAP | OP | BOCON | REIN | INTENT | GOAL | MAD | ECR | SOCI | EM | BEHR |
|-------|---------------|------|----|------|-------|----|-------|------|--------|------|-----|-----|------|----|------|
| BCT   |               |      |    |      |       |    |       |      |        |      |     |     |      |    |      |
| 1.1 A |               |      | X  |      |       |    |       |      | XX     | XXX  |     |     |      |    | X    |
| 1.2   |               |      | X  |      | XX    |    |       |      | X      | X    | X   |     |      | X  |      |
| 1.3   |               |      | X  |      |       |    |       |      | X      | XXX  |     |     |      |    |      |
| 1.4   |               |      |    |      |       |    |       |      |        | X    |     |     |      |    |      |
| 1.5   |               |      |    |      |       |    |       |      |        | XX   |     |     |      |    |      |
| 1.6   |               |      |    |      |       |    |       |      |        | X    |     |     |      |    |      |
| 1.7   |               |      |    |      |       |    |       |      |        | XX   |     |     |      |    |      |
| 1.8   |               |      |    |      |       |    |       |      | X Y    | X    |     |     |      |    |      |
| 1.9   |               |      |    |      |       |    |       |      | Y      |      |     |     |      |    |      |
| 2.1   |               |      | X  |      |       |    |       |      |        |      |     |     |      |    |      |
| 2.2   |               | X    |    |      | X     |    | X     |      |        |      |     |     |      |    |      |
| 2.3   |               |      | X  |      | X     |    | X     |      |        |      | X   |     |      |    | X    |
| 2.4   |               |      |    |      |       |    |       |      |        |      |     |     |      |    | X    |
| 2.5   |               |      | X  |      |       |    |       |      |        |      |     |     |      |    |      |
| 2.6   |               | XY   |    |      |       |    |       |      |        |      |     |     |      |    |      |
| 2.7   |               |      |    |      | X     |    | X     |      |        |      |     |     |      |    |      |
| 3.1   |               |      |    | X    | X     |    |       |      | X      | X    |     |     | XXX  |    |      |
| 3.2   |               |      |    | X    | X     |    |       |      | X      | X    |     | X   | XXX  |    |      |
| 3.3   |               |      |    | X    | X     |    |       |      | X      | X    |     |     | XY   | Y  |      |
| 4.1   |               | X    | X  |      | X     |    |       |      |        |      |     |     |      |    |      |
| 4.2   |               | XY   |    |      |       |    |       |      |        |      |     |     |      |    | X    |
| 4.4   |               |      |    |      |       |    |       |      |        |      |     |     |      |    |      |
| 5.1   |               | X XX |    |      |       |    | X     |      | X      |      |     |     |      |    |      |
| 5.2   |               |      |    |      |       |    | X Y   |      |        |      |     |     |      |    |      |
| 5.3   |               | X X  |    |      |       |    | XX Y  |      | X      | X    |     |     |      |    |      |
|       |               |      |    |      |       |    |       |      |        |      |     |     |      | Y  |      |
| 5.5   |               |      |    |      |       |    | X Y   |      |        |      |     |     |      |    |      |
| 5.6   |               |      |    |      |       |    | X Y   |      |        |      |     |     |      | Y  |      |

[illegible]

[illegible]

### Legend

BCT: Behaviour Change Technique; KN: Knowledge; SK: Skills; SPRI: Social/Professional Role and Identity; BOCap: Beliefs about Capabilities; OP: Optimism; BOCON: Beliefs about Consequences. REIN: Reinforcement; INTENT: Intentions; GOAL: Goals; MAD: Memory, Attention and Decision Processes; ECR: Environmental Context and Resources; SOCI: Social Influences; EM: Emotion; BEHR: Behavioural Regulation; BCT number as per Michie et al., 2013.

Red: Michie et al., (2008)

**Green:** Cane et al., (2015): all significant or borderline included form top down task: X = commonly used; Y = less common

**Blue:** The theory and techniques tool synthesising work by Carey et al., (2019), Connell et al., (2019) and Johnson et al., (2020). From <https://theoryandtechniquetool.humanbehaviourchange.org/tool>

## Coding Decisions

### Michie 2008:

- Goal setting and Monitoring separated into behaviour and outcome
- Rewards; incentives: coded as 10.3/10.6 Non specific
- Increasing skills: coded as problem solving and pros and cons (decisional balance)
- Stress management: coded as Reduce Negative Emotions
- Coping skills: coded as problem solving
- Rehearsal of relevant skills: coded as behavioural practice/rehearsal
- Role play: coded as demonstration of target behaviour
- Implementation: coded as action planning
- Prompts, triggers, cues: coded as Prompts and cues
- Environmental changes: coded as 12.2 Restructuring the social and physical environment; 12.5. Adding objects to the environment
- Social Processes of encouragement, pressure, support: coded as Social support (all)
- Persuasive communication: coded as Verbal persuasion about capability
- Information regarding behaviour, outcome: Information about health consequences, Information about social and environmental consequences
- Personalised message: not coded
- Modelling/demonstration of the behaviour: coded as demonstration of the behaviour
- Homework: not coded
- Personal experiments: coded as behavioural experiments
- Experiential: not coded
- Feedback: coded as feedback on behaviour; feedback on outcomes of behaviour
- Use of imagery: not coded
- Perform behaviour in different setting: coded as generalisation of the target behaviour
- Shaping of the behaviour: coded as Instruction in how to perform the behaviour
- Motivational interviewing: coded as Social support unspecified
- Relapse prevention: coded as problem solving
- Cognitive restructuring: coded as Framing/reframing,

- Relaxation: coded as body changes
- Desensitisation: not coded
- Time management: not coded
- Identify/prepare for difficult situation/problems: not coded

**Cane et al., 2015:**

- Vicarious reinforcement: coded as vicarious consequences
- Incentive: coded as all of 10.1. Material incentive (behaviour) 10.5. Social incentive 10.6. Non-specific incentive 10.7. Self-incentive 10.8. Incentive (outcome)
- Self-assessment of affective consequences: coded as Monitoring of emotional consequences

### Initial Behaviour Change Techniques coded to Groupings

| Grouping             | Coded from  | Potential BCTs                                                                                                                                                                                                                                                                                                                                                                                                |
|----------------------|-------------|---------------------------------------------------------------------------------------------------------------------------------------------------------------------------------------------------------------------------------------------------------------------------------------------------------------------------------------------------------------------------------------------------------------|
| Personal factors     | Matrix      | 1.2, 2.2, 2.3,2.6, 2.7,.3.1,3.2,3.3, 4.1,4.2,5.1,5.2,5.3,5.4, 5.6, 6.1, 8.1, 8.3, 8.4, 8.7, 9.2, 9.3,10.11, 11.2, 15.1, 15.3, 15.4, 16.1,16.2,16.3                                                                                                                                                                                                                                                            |
|                      | Transcripts | 1.4, 2.2, 2.3, 2.4, 3.1,3.2, 4.1,6.1, 8.1, 8.7, 11.1                                                                                                                                                                                                                                                                                                                                                          |
| Treatment Phase      | Matrix      | 1.1, 1.3, 1.4 <sup>a</sup> , 1.5, 1.7, 2.2 <sup>a</sup> , 2.4, 2.6, 3.1 <sup>a</sup> , 3.2 <sup>a</sup> ,3.3 <sup>a</sup> , 4.2, 5.1, 6.1 <sup>a</sup> , 6.2, 6.3, 7.1,7.2, 7.5,7.8, 8.1 <sup>a</sup> , 8.3, 8.4, 8.7 <sup>a</sup> , 10.1, 10.2, 10.3, 10.4 <sup>a</sup> , 10.5,10.6,10.7, 10.8, 10.9, 10.11, 12.1, 12.2, 12.3, 12.5, 12.6, 14.1, 14.2, 14.3, 14.4, 14.6, 14.7, 14.8, 14.9, 14.10, 13.1, 16.3 |
|                      | Transcripts | 1.1, 1.3, 1.4 <sup>a</sup> , 5.1, 5.3, 4.1 <sup>a</sup> , 6.1 <sup>a</sup> , 8.3, 8.6, 8.7 <sup>a</sup> , 10.4, 10.6, 12.5                                                                                                                                                                                                                                                                                    |
| Post-Discharge Phase | Matrix      | 1.2, 2.2 <sup>a</sup> , 2.3 <sup>a</sup> , 2.7, 3.1 <sup>a</sup> , 3.2 <sup>a</sup> , 3.3 <sup>a</sup> , 4.1 <sup>a</sup> , 6.1 <sup>a</sup> , 6.2, 6.3, 7.1,7.2, 7.5, 8.1 <sup>a</sup> , 8.7 <sup>a</sup> , 9.2, 10.4 <sup>a</sup> , 12.1, 12.2, 12.3, 12.5, 13.1, 15.1, 15.3, 15.4, 16.3                                                                                                                    |
|                      | Transcripts | 1.2, 1.8, 11.2 <sup>a</sup> , 12.2, 15.1                                                                                                                                                                                                                                                                                                                                                                      |

**Legend:** BCT: Behaviour Change Technique; <sup>a</sup>: denotes commonly identified overlapping Behaviour Change Techniques
